# Supplementary material
Source: publisher figshare collection journal article supplement (https://acs.figshare.com/ndownloader/files/10527292)
Supplement: Supplementary file 1 [file 10527292]

# Support Effect of the Fe/BN Catalyst on Fischer-Tropsch

## Performances: the Role of Surface B-O Defect

Jianghong Wu,<sup>†,‡</sup> Liancheng Wang,<sup>\*,†</sup> Xi Yang,<sup>†</sup> Baoliang Lv,<sup>†</sup> and Jiangang Chen<sup>\*,†</sup>

<sup>†</sup>State Key Laboratory of Coal Conversion, Shanxi Institute of Coal Chemistry, Chinese Academy of Sciences, Taiyuan 030001, China

<sup>‡</sup>Shanxi Institute of Energy, Jinzhong 030600, China

corresponding author's email: [wanglc@sxicc.ac.cn](mailto:wanglc@sxicc.ac.cn), [chenjg@sxicc.ac.cn](mailto:chenjg@sxicc.ac.cn)

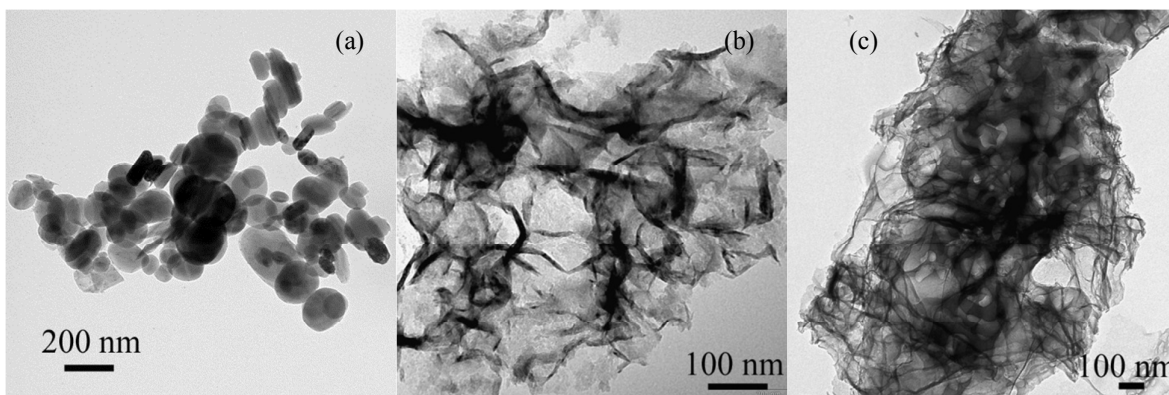

Figure S1. Typical TEM images of the three BN support, BN<sub>c</sub> (a), BN<sub>s</sub> (b) and BN<sub>p</sub> (c)

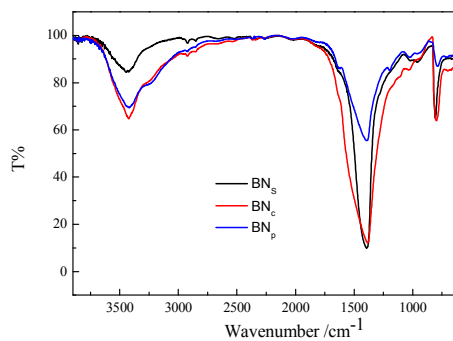

Figure S2. Typical FT-IR spectra of the three BN supports.
